# Supplementary material for: Single Cell Spatial Transcriptomic Profiling Identifies a LINE1 Associated Disarrayed Immune Microenvironment in Hepatocellular Carcinoma
Source: PubMed Central journal article supplement — bioRxiv. 2025 May 26:2023.12.04.570014. Originally published 2023 Dec 5. Preprint. [Version 2] doi: 10.1101/2023.12.04.570014 (PMC10723373; doi:10.1101/2023.12.04.570014), 2025-05-26
Supplement: media-1.pdf [file media-1.pdf]

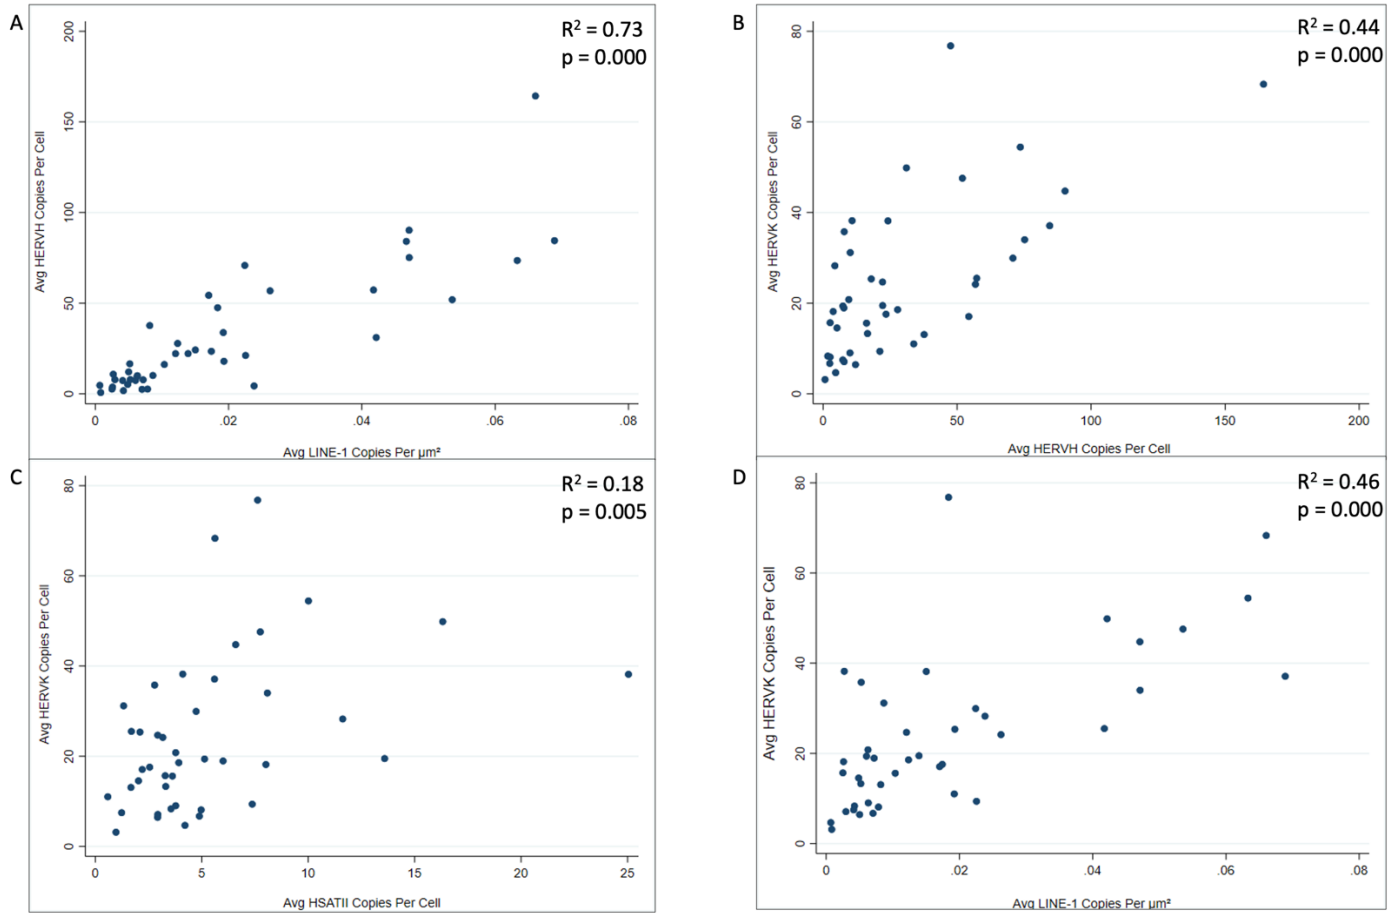

**Supplementary Figure 1. Relationship of repeat RNA expression levels with one another.** Scatter plots of **A.** LINE-1 vs HERV-H expression **B.** HERV-H vs HERV-K expression **C.** HSATII vs HERV-K expression and **D.** LINE-1 vs HERV-K expression. Results of linear regression analysis shown.
